# Supplementary material for: Responsiveness and Interest Representation in EU Multilevel Governance
Source: Research Square preprint supplement (doi:10.21203/rs.3.rs-8091152/v1), 2026-01-13
Supplement: Supplementary file 1 [file 617afe33b9692e6dd354f30c.docx]

**Appendix**

**Table A1.** Descriptive statistics of main variables

| Variables | Minimum | Median | Mean | Maximum | St. dev. |
| --- | --- | --- | --- | --- | --- |
| Policy position of all legislators | 0.00 | 65.00 | 58.90 | 100.00 | 33.36 |
| Preference congruence | 0.00 | 1.00 | 0.50 | 1.000 | 0.50 |
| EU interest groups opposition | 0.00 | 19.00 | 25.63 | 303. | 34.53 |
| Non-state groups opposition | 0.00 | 12.00 | 16.63 | 64.00 | 15.23 |
| Preference heterogeneity among stakeholders | -0.54 | 0.12 | 0.14 | 0.56 | 4.68 |
| Salience of policy issue | 24.00 | 145.0 | 164.00 | 414.00 | 98.17 |
| Contestation of policy issue | 1.00 | 3.00 | 3.12 | 6.00 | 1.26 |
| Number of Legislators | 2.00 | 17.00 | 20.11 | 30.00 | 7.02 |
| Legislative duration (months) | 9.00 | 23.00 | 25.75 | 65.00 | 11.92 |
| Novelty of act | 0.00 | 1.00 | 0.54 | 1.00 | 0.50 |
| The magnitude of policy change | 0.00 | 4.00 | 6.01 | 47.00 | 7.03 |
| Complexity of legislative act | 0.00 | 3.00 | 2.53 | 6.00 | 1.40 |

**Table A2.** Correlation matrix of main variables

| Variable | 1 | 2 | 3 | 4 | 5 | 6 | 8 | 9 | 10 | 11 |
| --- | --- | --- | --- | --- | --- | --- | --- | --- | --- | --- |
| Policy position | 1 |  |  |  |  |  |  |  |  |  |
| EU interest groups opposition | -0.049 | 1 |  |  |  |  |  |  |  |  |
| Non-state groups opposition | -0.008 | 0.473 | 1 |  |  |  |  |  |  |  |
| Preference heterogeneity among stakeholders | -0.027 | -0.010 | -0.255 | 1 |  |  |  |  |  |  |
| Salience of policy issue | -0.529 | -0.085 | -0.023 | 1 |  |  |  |  |  |  |
| Contestation of policy issue | -0.037 | -0.252 | -0.360 | 0.031 | 1 |  |  |  |  |  |
| Number of Legislators | -0.044 | 0.154 | 0.171 | 0.201 | 0.075 | 1 |  |  |  |  |
| Legislative duration | 0.372 | -0.031 | -0.147 | -0.189 | 0.229 | -0.184 | 1 |  |  |  |
| Novelty of act | -0.114 | -0.165 | -0.075 | 0.072 | -0.007 | -0.113 | -0.190 | 1 |  |  |
| Policy change | -0.014 | 0.649 | 0.253 | 0.007 | -0.083 | 0.154 | 0.115 | -0.118 | 1 |  |
| Complexity of legislative act | 0.063 | -0.047 | -0.128 | -0.015 | 0.128 | 0.150 | 0.303 | -0.081 | -0.022 | 1 |

Note: Dependent variable is policy position: output score of decision-making presented by all EU decision-makers.

**Table A3.** Robustness checks of OLS models for policy position of EU decision-makers

| **Variables** | **Model 1** | | **Model 2** | | **Model 3** | | **Model 4** | | **Model 5** | | **Model 6** | | **Model 7** | |
| --- | --- | --- | --- | --- | --- | --- | --- | --- | --- | --- | --- | --- | --- | --- |
| ***Characteristics of explanatory variables*** | | | | | | | | | | | | | | |
| EU interest groups opposition | -0.159* (0.090) | | -0.147* (0.090) | | -0.151* (0.089) | | -0.161* (0.089) | | -0.297 (0.291) | | -0.108 (0.349) | |  | |
| Non-state groups opposition | 0.128 (0.174) | | 0.112 (0.176) | | 0.116 (0.175) | | 0.097 (0.174) | | 0.133 (0.170) | |  | |  | |
| Preference heterogeneity among stakeholders | -9.108 (9.388) | | -8.969 (9.393) | | -9.463 (9.442) | | -8.301 (9.268) | |  | |  | | -7.344 (2.064) | |
| Preference heterogeneity among stakeholders*salience | -0.081 (0.089) | | -0.080 (0.089) | | -0.080 (0.089) | | -0.081 (0.088) | |  | |  | |  | |
| EU interest groups opposition*salience |  | |  | |  | |  | | 0.001 (0.001) | |  | |  | |
| EU interest groups opposition*legislative duration |  | |  | |  | |  | |  | | -0.002 (0.014) | |  | |
| Preference heterogeneity among stakeholders* legislative duration |  | |  | |  | |  | |  | |  | | 1.873* (0.763) | |
| ***Other controls*** | |  | |  | |  | |  | |  | |  | |  | |
| Novelty of act | | -5.680 (4.20) | | -4.782 (4.473) | | -4.799 (4.460) | | -3.310 (4.564) | | -4.572 (4.753) | | -4.303 (4.849) | | -2.477 (4.472) | |
| The magnitude of policy change | | 0.095 (0.416) | | 0.007 (0.409) | | 0.040 (0.404) | | 0.223 (0.417) | | 0.332 (0.425) | | 0.323 (0.425) | | -0.161 (0.319) | |
| Complexity of legislative act | | -2.042 (1.662) | | -2.299 (1.715) | | -2.286 (1.708) | | -2.674 (1.721) | | -2.549 (1.802) | | -2.820 (1.774) | | -2.464 (1.698) | |
| Constant | | 74.049*** (12.313) | | 74.474*** (12.268) | | 76.093*** (12.228) | | 40.786* (20.036) | | 39.738* (20.936) | | 38.708* (21.038) | | 44.342* (19.420) | |
| N | | 500 | | 500 | | 500 | | 500 | | 500 | | 500 | | 500 | |
| Rseudo R-squared | | 0.426 | | 0.425 | | 0.425 | | 0.444 | | 0.414 | | 0.411 | | 0.451 | |

Notes: All are mixed effects regressions; Standard errors in parentheses; Dependent variable is output score of policy position presented by all EU decision-makers and position score of the Commission. *p<0.1; **p<0.05; ***p<0.01.
